# Supplementary material for: Potassium Ion Channel Gene OsAKT1 Affects Iron Translocation in Rice Plants Exposed to Iron Toxicity
Source: PubMed Central journal article supplement (PMC6517512; doi:10.3389/fpls.2019.00579), 2019-05-08
Supplement: Image_1.pdf [file Image_1.pdf]

# Supplementary Figure S1

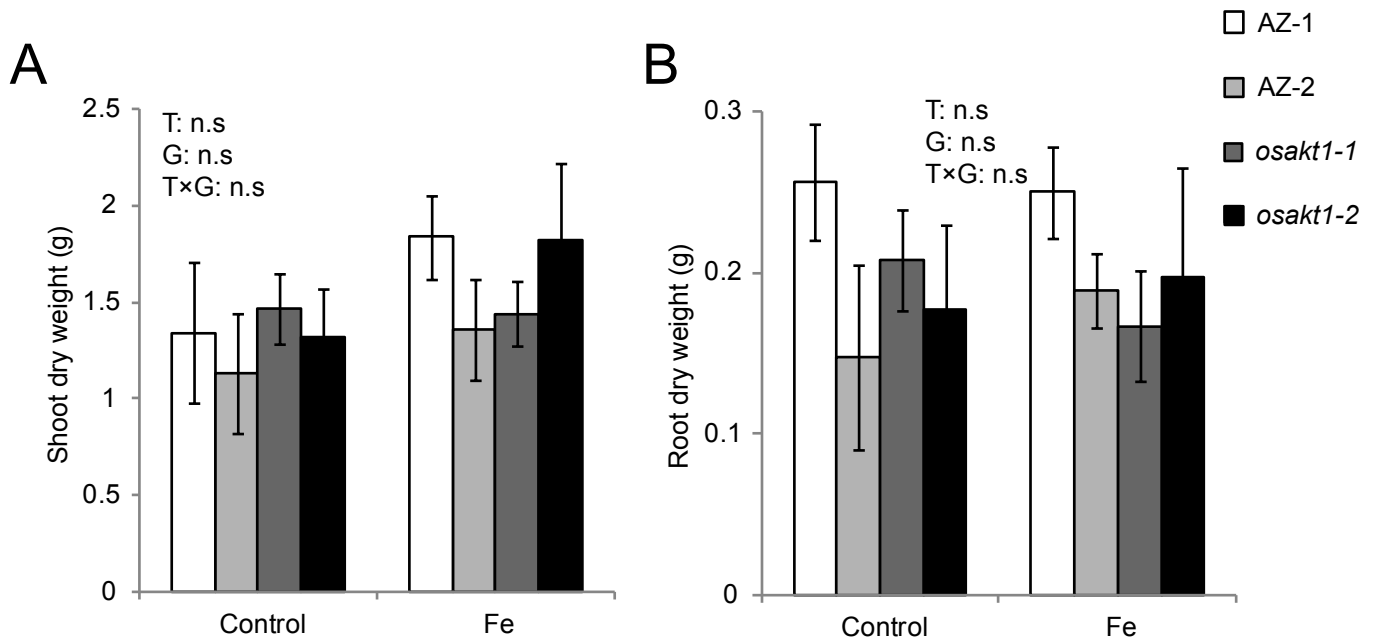

**Supporting Information Figure S1.** Shoot and root biomass of *OsAKT1* mutant lines exposed to Fe toxicity (1,000 mg Fe<sup>2+</sup> L<sup>-1</sup> for 5 days). (A) Shoot dry weight. (B) Root dry weight. Vertical bars represent mean values ± standard errors (N=4). T: treatment; G: genotype; T×G: treatment by genotype interaction; n.s: not significant; AZ: azygous lines,
