# Supplementary material for: Potassium Ion Channel Gene OsAKT1 Affects Iron Translocation in Rice Plants Exposed to Iron Toxicity
Source: PubMed Central journal article supplement (PMC6517512; doi:10.3389/fpls.2019.00579), 2019-05-08
Supplement: Table_1.pdf [file Table_1.pdf]

**Supplementary Table 1.** Sequences of the primers used in this study were listed below.

| <b>Purpose</b>                | <b>Primer_ID</b> | <b>Sequence (5'-3')</b> |
|-------------------------------|------------------|-------------------------|
| NG1928 genotyping             | P1_F             | CGTGAGGCCATGACATATTG    |
|                               | P1_R             | AATGGCTGGTGTCTGTAAGG    |
| NC2778 genotyping             | P2_F             | AGCTTGTTGCTGCTTGGATT    |
|                               | P2_R             | TAGGCTAGAGCCACTGCCAT    |
| Tos17 primer                  | Tos_tail6        | AGGTTGCAAGTTAGTTAAGA    |
| qRT-PCR for <i>OsAKT1</i>     | qAKT1_F          | GCTTCCAAAGGAAACGAGCAA   |
|                               | qAKT1_R          | GCAAGCGTATAAGCCCGTGTC   |
| Reference gene, <i>OsUBQ5</i> | UBQ5_F           | ACCACTTCGACCGCCACTACT   |
|                               | UBQ5_R           | ACGCCTAAGCCTGCTGGTT     |
| qRT-PCR for <i>OsFRDL1</i>    | qFRDL1_F         | TCACCAATGCTAAGGCCTGC    |
|                               | qFRDL1_R         | AACCACGGAAAACACCCTG     |
| qRT-PCR for <i>OsIRT1</i>     | qIRT1_F          | TTCGCCGTCGTCAAGGC       |
|                               | qIRT1_R          | GGCGAGGTGAGGTTGTTGA     |
| qRT-PCR for <i>OsYSL2</i>     | qYSL2_F          | TGCTGAGTTCGACATGGTATG   |
|                               | qYSL2_R          | GGCCGGTCTATCCATTACCT    |
| qRT-PCR for <i>OsYSL15</i>    | qYSL15_F         | ATCTCACCTTGACATCGCCG    |
|                               | qYSL15_R         | AAACGCCCTGTAGAACAGCA    |

*OsAKT1*: potassium ion channel, LOC\_Os01g45990; *OsUBQ5*: rice ubiquitin gene, LOC\_Os01g22490, *OsFRDL1*: FRD3-like protein 1, LOC\_Os03g11734, *OsIRT1*: iron-regulated transporter 1, LOC\_Os03g46470, *OsYSL2*: yellow strip-like gene 2, LOC\_Os02g43370, *OsYSL15*: yellow strip-like gene 15, LOC\_Os02g43410. qRT-PCR: quantitative reverse transcription PCR, F: forward, R: reverse.
